# Supplementary material
Source: PubMed Central journal article supplement (PMC8864301)
Supplement: mmc1.pdf [file mmc1.pdf]

# THE LANCET

## Global Health

### Supplementary appendix

This appendix formed part of the original submission. We post it as supplied by the authors.

Supplement to: Parker EPK, Desai S, Marti M, et al. Response to additional COVID-19 vaccine doses in people who are immunocompromised: a rapid review. *Lancet Glob Health* 2022; **10**: e326–28.

## Appendix

The material below is adapted from the WHO's *Interim recommendations for an extended primary series with an additional vaccine dose for COVID-19 vaccination in immunocompromised persons*<sup>1</sup> (published under a [CC BY-NC-SA 3.0 IGO](https://creativecommons.org/licenses/by-nc-sa/3.0/) license).

### Rapid review methods

#### Search terms

A search in MEDLINE was performed to identify articles published between 1 July 2020 and 27 September 2021 using the search terms listed below.

| Row | Term                                                                                                                                                                                                                                                                                                                                                                                                                                                                                                                                                                                                                              | Purpose                                          |
|-----|-----------------------------------------------------------------------------------------------------------------------------------------------------------------------------------------------------------------------------------------------------------------------------------------------------------------------------------------------------------------------------------------------------------------------------------------------------------------------------------------------------------------------------------------------------------------------------------------------------------------------------------|--------------------------------------------------|
| 1   | Coronavirus/ or Coronaviridae/ or SARS-CoV-2/ or coronaviridae infections/ or coronavirus infections/ or covid-19/                                                                                                                                                                                                                                                                                                                                                                                                                                                                                                                | Controlled MEDLINE vocabulary terms for COVID-19 |
| 2   | ("covid*" or "COVID-19*" or COVID19* or "COVID-2019*" or COVID2019* or "SARS-CoV-2*" or "SARSCoV-2*" or "SARSCoV2*" or "SARS-CoV2*" or SARSCov19* or "SARS-Cov19*" or "SARSCov-19*" or "SARS-Cov-19*" or SARSCov2019* or "SARS-Cov2019*" or "SARSCov-2019*" or "SARS-Cov-2019*" or SARS2* or "SARS-2*" or SARScoronavirus2* or "SARS-coronavirus-2*" or "SARScoronavirus 2*" or "SARS coronavirus2*" or SARScoronavirus2* or "SARS-coronavirus-2*" or "SARS coronavirus 2*" or "SARS coronavirus2*" or (coronavirus* or coronavirus* or coronavirinae* or CoV) or ((corona* or conono*) adj1 (virus* or viral* or virinae*))).mp. | Free text terms for COVID-19 (adapted from 2)    |
| 3   | 1 or 2                                                                                                                                                                                                                                                                                                                                                                                                                                                                                                                                                                                                                            | Combine articles identified by rows 1 or 2       |
| 4   | Vaccines/ or COVID-19 Vaccines/ or immunization/ or immunization schedule/ or vaccination/                                                                                                                                                                                                                                                                                                                                                                                                                                                                                                                                        | Controlled vocabulary terms for vaccine          |
| 5   | (vaccin* or immunis* or immuniz*).mp.                                                                                                                                                                                                                                                                                                                                                                                                                                                                                                                                                                                             | Free text terms for vaccine                      |
| 6   | 4 or 5                                                                                                                                                                                                                                                                                                                                                                                                                                                                                                                                                                                                                            | Combine articles identified by rows 4 or 5       |
| 7   | (immunosuppress* or immunocomp* or immunodeficien* or deficien* or autoimmun* or HIV or transplant* or cancer* or malignan* or tumo?r* or leuk?emia or oncol* or dialysis or h?em* or rheumat* or malnutrition).mp.                                                                                                                                                                                                                                                                                                                                                                                                               | Free text terms for immunodeficiency             |
| 8   | 3 and 6 and 7                                                                                                                                                                                                                                                                                                                                                                                                                                                                                                                                                                                                                     | Select articles identified by rows 3, 6, and 7   |
| 9   | limit 8 to dt="20200701-20210927"                                                                                                                                                                                                                                                                                                                                                                                                                                                                                                                                                                                                 | Limit to studies uploaded from 1 July 2020       |

*medRxiv* preprints were identified using the search strategy below, implemented on 29<sup>th</sup> September 2021 with the package *medrxiv* using the programming language R.

| Row | Term                                                                                                                                                                                                                                                                                                                                                                                 | Purpose                              |
|-----|--------------------------------------------------------------------------------------------------------------------------------------------------------------------------------------------------------------------------------------------------------------------------------------------------------------------------------------------------------------------------------------|--------------------------------------|
| 1   | ("coronavirus" or "COVID-19" or "SARS-CoV-2")                                                                                                                                                                                                                                                                                                                                        | Free text terms for COVID-19         |
| 2   | ("vaccine" or "vaccines")                                                                                                                                                                                                                                                                                                                                                            | Free text terms for vaccine          |
| 3   | ("immunosuppressed" or "immunosuppressive" or "immunocompromised" or "immunocompromising" or "immunodeficient" or "immunodeficiency" or "autoimmune" or "autoimmunity" or "HIV" or "transplant" or "cancer" or "malignancy" OR "tumor" or "tumour" or "leukemia" or "leukaemia" or "dialysis" or "hemodialysis" or "haemodialysis" or "rheumatic" or "rheumatoid" or "malnutrition") | Free text terms for immunodeficiency |
| 4   | ("additional" or "extra" or "third" or "three" or "boost" or "booster" or "boosters" or "boosting")                                                                                                                                                                                                                                                                                  | Free text terms for additional doses |

|   |                                       |                                                                                           |
|---|---------------------------------------|-------------------------------------------------------------------------------------------|
| 5 | ("dose" or "doses")                   |                                                                                           |
| 6 | <b>Search #1:</b> 1 and 2 and 3       | Final search for vaccine response in ICPs (articles identified by rows 1, 2, and 3)       |
| 7 | <b>Search #2:</b> 1 and 2 and 4 and 5 | Final search for studies of additional doses (articles identified by rows 1, 2, 4, and 5) |

Additional articles were identified by scanning the reference lists of included articles.

### *Scope and eligibility criteria*

Following removal of duplicates, titles and abstracts were screened to identify articles reporting on safety, immunogenicity, and/or vaccine effectiveness (VE) of an additional COVID-19 vaccine dose in immunocompromised persons (ICPs). The population of interest included ICPs with active cancer, solid organ or stem cell transplants, immunodeficiency (including severe primary immunodeficiency or chronic dialysis), HIV, or active treatment causing significant immunosuppression. We also included studies reporting on a broader category of immunosuppressed individuals overlapping with the conditions listed above. Articles reporting outcomes for fewer than 10 ICPs were excluded. The intervention of interest included a single additional dose of a COVID-19 vaccine with a WHO Emergency Use Listing (EUL). At the time of the search, this included Ad26.COVS.2 (Janssen), BIBP (Sinopharm), BNT162b2 (Pfizer/BioNTech), ChAdOx1-S (AstraZeneca), CoronaVac (Sinovac), and mRNA-1273 (Moderna), wherein a standard primary series comprised a one-dose schedule (for Ad26.COVS.2) or two-dose schedule (for all other vaccines) as per the product-specific EULs.

Our primary outcome of interest was the proportion of individuals with detectable spike-specific binding antibodies before versus after the additional dose. Secondary outcomes of interest included: (i) antibody response rates among individuals with low or undetectable antibodies prior to the additional dose; and (ii) product-specific VE of an extended primary series including an additional dose in ICPs. For the purposes of this rapid review, we allowed the antibody response criteria (e.g. assay and thresholds) to be defined on a case-by-case basis for each study. We included clinical trials (including randomised and non-randomised trials) and observational studies (including case series, case-control studies, and cohort studies).

### *Data extraction*

We extracted data on study location, ICP group (solid organ transplant, dialysis, cancer, or other), design, age, sex, sample size (N receiving additional dose), vaccine(s) used for primary series, vaccine(s) used for additional dose, dosing interval prior to additional dose, timing of sample collection after the additional dose, antibody response criteria (assay and threshold), and antibody response rate before and after the additional dose. Where the study cohort received a mixture of vaccine products for both the primary series and additional dose, we combined across vaccine groups during data extraction. Formal extraction and analysis of reactogenicity and cellular immune response data were beyond the scope of this rapid review, as was a formal assessment of the quality of evidence. However, we comment on key trends in adverse events across from the included studies in the main text.

Using the programming language R, we visualised data on: (i) cumulative antibody response rates before and after the additional dose, stratified by ICP group; and (ii) antibody response rates among with low or undetectable antibodies prior to the additional dose. Code can be made available by the corresponding author on request.

**Evidence on the immunogenicity of an additional COVID-19 vaccine dose in immunocompromised persons.**

| Study                           | Group | Country | Design | Vaccine(s)     |                 | Interval, primary series to additional dose (months) <sup>a</sup> | Time of sampling after additional dose (weeks) <sup>b</sup> | Definition of response                  | Assay      | N receiving additional dose | Male, % | Age (years), mean (sd) or median (IQR) (marked as *) | Overall response rate after primary series, % (N) | Response rate after additional dose, % (N) |                                                      |
|---------------------------------|-------|---------|--------|----------------|-----------------|-------------------------------------------------------------------|-------------------------------------------------------------|-----------------------------------------|------------|-----------------------------|---------|------------------------------------------------------|---------------------------------------------------|--------------------------------------------|------------------------------------------------------|
|                                 |       |         |        | Primary series | Additional dose |                                                                   |                                                             |                                         |            |                             |         |                                                      |                                                   | Overall                                    | Subset with low/absent response after primary series |
| Del Bello et al. <sup>3</sup>   | SOT   | France  | R-COH  | BNT162b2       | BNT162b2        | 2                                                                 | 4                                                           | Detectable S-Ig (multiple assays)       | Multiple   | 396                         | 65%     | 59 (15)                                              | 41% (396)                                         | 68% (396)                                  | 45% (232)                                            |
| Masset et al. <sup>4c</sup>     | SOT   | France  | R-COH  | BNT162b2       | BNT162b2        | 2                                                                 | 4                                                           | Detectable S-IgG (multiple assays)      | Multiple   | 136                         | 60%     | 61 (12)                                              | 50% (456)                                         | 69% (136)                                  | n.r.                                                 |
| Kamar et al. <sup>5</sup>       | SOT   | France  | R-COH  | BNT162b2       | BNT162b2        | 2                                                                 | 4                                                           | S-Ig S/Co >1.1                          | Wantai     | 99                          | 69%     | 58 (2)                                               | 40% (99)                                          | 68% (99)                                   | 44% (59)                                             |
| Chavarot et al. <sup>6d</sup>   | SOT   | France  | R-COH  | BNT162b2       | BNT162b2        | 2                                                                 | 4                                                           | S-IgG >50 AU/ml                         | Abbott     | 62                          | 58%     | 64.5 (51–72)*                                        | 0% (62)                                           | 6% (62)                                    | 6% (62)                                              |
| Stumpf et al. <sup>7e</sup>     | SOT   | Germany | P-COH  | BNT162b2       | BNT162b2        | 2                                                                 | 4                                                           | S1-IgA S/Co ≥1.1 or S1-IgG ≥35.2 BAU/ml | Euro-immun | 48                          | 63%     | 57 (14)                                              | 32% (71)                                          | 55% (71) <sup>†</sup>                      | n.r.                                                 |
| Massa et al. <sup>8</sup>       | SOT   | France  | P-COH  | BNT162b2       | BNT162b2        | 1                                                                 | 4                                                           | RBD-IgG >50 AU/ml                       | Abbott     | 61                          | 72%     | 58 (47–66)*                                          | 44% (61)                                          | 62% (61)                                   | 32% (34)                                             |
| Charmetant et al. <sup>9f</sup> | SOT   | France  | P-COH  | BNT162b2       | BNT162b2        | n.r.                                                              | 2                                                           | RBD-IgG ≥142 BAU/ml                     | Maglumi    | 66                          | 56%     | 56 (12)                                              | n.r.                                              | n.r.                                       | 42% (66)                                             |
| Peled et al. <sup>10g</sup>     | SOT   | Israel  | P-COH  | BNT162b2       | BNT162b2        | 6                                                                 | 3                                                           | Detectable RBD-IgG                      | In-house   | 96                          | 71%     | 61 (50–68)*                                          | 23% (96)                                          | 67% (96)                                   | n.r.                                                 |
| Westhoff et al. <sup>11</sup>   | SOT   | Germany | P-COH  | BNT162b2       | mRNA-1273       | 2                                                                 | 2                                                           | S-IgG ≥0.8 U/ml                         | Roche      | 10                          | 80%     | 60 (12)                                              | n.r.                                              | n.r.                                       | 60% (10)                                             |
| Frantzen et al. <sup>12h</sup>  | DIAL  | France  | P-COH  | BNT162b2       | BNT162b2        | 2–3                                                               | 4                                                           | S-Ig >15 U/ml                           | Roche      | 88                          | 73%     | 76 (65–83)*                                          | n.r.                                              | n.r.                                       | 88% (17)                                             |
| Espi et al. <sup>13i</sup>      | DIAL  | France  | P-COH  | BNT162b2       | BNT162b2        | ≤3                                                                | 1–2                                                         | RBD-IgG ≥977 BAU/ml                     | Maglumi    | 75                          | 64%     | 66 (14)                                              | 38% (106)                                         | n.r.                                       | 54% (56)                                             |
| Ducloux et al. <sup>14</sup>    | DIAL  | France  | P-COH  | BNT162b2       | BNT162b2        | n.r.                                                              | 4                                                           | RBD-IgG >50 AU/ml                       | Abbott     | 45                          | n.r.    | n.r.                                                 | 89% (45)                                          | 93% (45)                                   | 40% (5)                                              |
| Longlune et al. <sup>15j</sup>  | DIAL  | France  | R-COH  | BNT162b2       | BNT162b2        | 1                                                                 | 4                                                           | S-Ig S/Co >1.1                          | Wantai     | 12                          | 69%     | 64 (14)                                              | 84% (82)                                          | 90% (82) <sup>†</sup>                      | 42% (12)                                             |

|                                    |       |         |       |                                        |                                        |    |   |                                                      |                |     |     |             |           |          |           |
|------------------------------------|-------|---------|-------|----------------------------------------|----------------------------------------|----|---|------------------------------------------------------|----------------|-----|-----|-------------|-----------|----------|-----------|
| Bensouna et al. <sup>16k</sup>     | DIAL  | France  | R-COH | BNT162b2                               | BNT162b2                               | 1  | 4 | S1-Ig<br>≥0.8 AU/ml                                  | Roche          | 69  | 65% | 68 (53–76)* | 96% (69)  | 97% (69) | 33% (3)   |
| Re et al. <sup>17</sup>            | CAN   | France  | P-COH | BNT162b2                               | BNT162b2                               | 3  | 4 | S-IgG<br>≥0.8 U/ml                                   | Roche          | 43  | 63% | 77 (n.r.)*  | 58% (43)  | 58% (43) | 0% (18)   |
| Gouinant et al. <sup>18l</sup>     | CAN   | France  | P-COH | BNT162b2                               | BNT162b2                               | ≥1 | 4 | S-IgG<br>≥300<br>AU/ml                               | Abbott         | 26  | 59% | 67 (27–92)  | 87% (269) | n.r.     | 88% (26)  |
| Benotmane et al. <sup>19m</sup>    | SOT   | France  | P-COH | mRNA-1273                              | mRNA-1273                              | 2  | 4 | RBD-IgG<br>≥50 AU/ml                                 | Abbott         | 159 | 62% | 58 (50–66)* | n.r.      | n.r.     | 49% (159) |
| Hall et al. <sup>20n</sup>         | SOT   | Canada  | RT    | mRNA-1273                              | mRNA-1273                              | 2  | 4 | RBD-Ig<br>≥100 U/ml                                  | Roche          | 60  | 62% | 67 (64–72)* | 12% (60)  | 55% (60) | n.r.      |
| Greenberger et al. <sup>21o</sup>  | CAN   | USA     | P-REG | BNT162b2/<br>mRNA-1273/<br>Ad26.COV2.S | BNT162b2/<br>mRNA-1273/<br>Ad26.COV2.S | 3  | 4 | RBD-IgG<br>≥0.8 U/ml                                 | Roche          | 49  | 57% | 66 (n.r.)   | n.r.      | n.r.     | 55% (38)  |
| Connolly et al. <sup>22p</sup>     | IC/IS | USA     | P-COH | BNT162b2/<br>mRNA-1273/<br>Ad26.COV2.S | BNT162b2/<br>mRNA-1273/<br>Ad26.COV2.S | 3  | 4 | RBD-Ig<br>≥0.8 U/ml                                  | Roche          | 18  | 28% | 55 (44–63)* | n.r.      | n.r.     | 80% (10)  |
| Werbel et al. <sup>23q</sup>       | SOT   | USA     | CS    | BNT162b2/<br>mRNA-1273                 | BNT162b2/<br>mRNA-1273/<br>Ad26.COV2.S | 2  | 2 | Detectable<br>S1- or RBD-<br>Ig (multiple<br>assays) | Multiple       | 30  | 43% | 57 (44–62)* | 20% (30)  | 47% (30) | 33% (24)  |
| Schrezenmeier et al. <sup>24</sup> | SOT   | Germany | P-COH | BNT162b2                               | BNT162b2                               | 4  | 3 | S1-IgG<br>S/Co ≥1.1                                  | Euro-<br>immun | 14  | 66% | 60 (14)     | n.r.      | n.r.     | 28% (14)  |
|                                    |       |         |       |                                        | ChAdOx-1 S                             | 3  |   |                                                      |                | 11  |     |             | n.r.      | n.r.     | 45% (11)  |
| Bonelli et al. <sup>25r</sup>      | IC/IS | Austria | RT    | BNT162b2/<br>mRNA-1273                 | BNT162b2/<br>mRNA-1273                 | ≥1 | 4 | RBD-IgG<br>≥0.8<br>BAU/ml                            | Roche          | 28  | 18% | 59 (18)     | n.r.      | n.r.     | 32% (28)  |
|                                    |       |         |       |                                        | ChAdOx-1 S                             |    |   |                                                      |                | 27  | 33% | 61 (15)     | n.r.      | n.r.     | 22% (27)  |

The table includes studies reporting on SARS-CoV-2-specific binding antibody responses following an additional vaccine dose in ICPs. Other immunogenicity endpoints, including neutralising antibody and T-cell responses, were also reported in several studies.

AU, arbitrary units; BAU, binding antibody units; CAN, cancer; CS, case series; DIAL, dialysis; IC/IS, immunocompromised/immunosuppressed; n.r., not reported; OBS, observational study; P-COH, prospective cohort; P-REG, prospective registry; RBD, receptor binding domain; R-COH, retrospective cohort; RT, randomised trial; S, spike; S/Co, signal-to-cut-off ratio; sd, standard deviation; SOT, solid organ transplant; † denominator includes subjects who did not receive an additional dose but responded after the primary vaccine series.

<sup>a</sup> Average interval rounded to nearest month.

<sup>b</sup> Average interval rounded to nearest week.

<sup>c</sup> Age and sex reported for parent cohort of 456 individuals.

<sup>d</sup> Restricted to subset of patients without prior COVID-19. All patients were being treated with belatacept.

<sup>e</sup> An additional dose was given to 48 patients with an insufficient response after two doses (specific criteria not defined). Age and sex reported for parent cohort of 71 individuals.

<sup>f</sup> Age reported for parent cohort of 93 individuals. Response rates were 78% in individuals with low but detectable antibodies after dose 2 versus 18% in individuals with no detectable antibodies after dose 2.

<sup>g</sup> Response to primary series was measured immediately before the third dose (i.e. 6 months after dose 2); the low seropositivity rates may partly reflect waning of antibody responses.

<sup>h</sup> Patients with no detectable antibodies (<0.8 U/ml) received a third dose 2 months after their primary series ( $n = 6$ ), while patients with low but detectable antibodies (0.8–250 U/ml) received a third dose 3 months after their primary series ( $n = 82$ ). Included here is the response rate for the 17 patients with antibody levels <15 U/ml prior to their third dose. A significant increase in median antibody concentration after dose 3 was observed in the 71 individuals with low but detectable antibodies after dose 2.

<sup>i</sup> All patients received a third dose within 3 months of dose 2. The average interval between dose 2 and dose 3 was not reported. An antibody threshold of  $\geq 977$  AU/ml was the lowest concentration observed in a cohort of 30 healthy volunteers and was therefore used as a threshold for an “optimal” response. Response rates were 66% in individuals with low antibodies after dose 2 ( $n = 44$ ) versus 8% in individuals with no detectable antibodies after dose 2 ( $n = 12$ ). An additional 19 individuals who received a third dose had an optimal response after dose 2 and were excluded here.

<sup>j</sup> Age and sex reported for parent cohort of 112 individuals. An additional dose was offered to 12 patients with no detectable antibodies after dose 2.

<sup>k</sup> An additional 12 patients had a weak S1-Ig response after dose 2 (<50 AU/ml). S1-Ig levels rose to  $\geq 50$  AU/ml in 11/12 (92%) of these patients after dose 3.

<sup>l</sup> Age and sex reported for parent cohort of 306 individuals. Patients with S-IgG concentrations of <300 AU/ml were offered a third dose from 1 month after dose 2. The average interval between dose 2 and dose 3 was not reported.

<sup>m</sup> Response rates were 81% in individuals with low antibodies after dose 2 ( $n = 64$ ) versus 27% in individuals with no detectable antibodies after dose 2 ( $n = 95$ ).

<sup>n</sup> Patients were enrolled without knowledge of their antibody response after dose 2. Response rate was 18% in placebo recipient ( $n = 57$ ).

<sup>o</sup> Results for the 38 patients who had RBD-IgG concentrations <0.8 AU/ml prior to the additional dose. These patients received a primary series of BNT162b2 ( $n = 27$ ), mRNA-1273 ( $n = 10$ ), or Ad26.COVS.2 ( $n = 1$ ), followed by an additional dose of Ad26.COVS.2 ( $n = 17$ ), BNT162b2 ( $n = 11$ ), or mRNA-1273 ( $n = 10$ ). Results are combined across vaccine groups given the small numbers involved. A further 11 individuals were seropositive following the primary series; all exhibited higher antibody concentrations after the additional dose.

<sup>p</sup> Cohort of patients with autoimmune disease. Results are for the 10 patients who were seronegative prior to the additional dose. These patients received a primary series of BNT162b2 ( $n = 5$ ), Ad26.COVS.2 ( $n = 3$ ), or mRNA-1273 ( $n = 2$ ), followed by an additional dose of Ad26.COVS.2 ( $n = 4$ ), mRNA-1273 ( $n = 4$ ), or BNT162b2 ( $n = 2$ ). Results are combined across vaccine groups given the small numbers involved. A further 8 individuals were seropositive following the primary series; all exhibited higher antibody concentrations after the additional dose.

<sup>q</sup> Patients received a primary series of BNT162b2 ( $n = 17$ ) or mRNA-1273 ( $n = 13$ ), followed by an additional dose of Ad26.COVS.2 ( $n = 15$ ), mRNA-1273 ( $n = 10$ ), or BNT162b2 ( $n = 5$ ). Results are combined across vaccine groups given the small numbers involved. A follow-up study reporting additional third-dose immunogenicity data on the same cohort has also been published<sup>26</sup>.

<sup>r</sup> All patients were being treated with rituximab. Patients received a third dose at least 4 weeks after the primary series.

## References

1. WHO. Interim recommendations for an extended primary series with an additional vaccine dose for COVID-19 vaccination in immunocompromised persons (26 October 2021). Available from: <https://apps.who.int/iris/bitstream/handle/10665/347079/WHO-2019-nCoV-Vaccination-SAGE-recommendation-Immunocompromised-persons-2021.1-eng.pdf>.
2. NICE. Interim process and methods for developing rapid guidelines on COVID-19 (20 March 2020). Available from: <https://www.nice.org.uk/process/pmg35/chapter/appendix-search-strategy-for-medline-ovid-platform>.
3. Del Bello A, Abravanel F, Marion O, et al. Efficiency of a boost with a third dose of anti-SARS-CoV-2 messenger RNA-based vaccines in solid organ transplant recipients. *Am J Transplant* 2021; online ahead of print.
4. Masset C, Kerleau C, Garandeau C, et al. A third injection of BNT162b2 mRNA Covid-19 vaccine in kidney transplant recipients improves the humoral immune response. *Kidney Int* 2021; online ahead of print.
5. Kamar N, Abravanel F, Marion O, Couat C, Izopet J, Del Bello A. Three doses of an mRNA Covid-19 vaccine in solid-organ transplant recipients. *N Engl J Med* 2021; **385**(7): 661-2.
6. Chavarot N, Morel A, Leruez-Ville M, et al. Weak antibody response to 3 doses of mRNA vaccine in kidney transplant recipients treated with belatacept. *Am J Transplant* 2021; online ahead of print.
7. Stumpf J, Tonnus W, Paliege A, et al. Cellular and humoral immune responses after Three Doses of BNT162b2 mRNA SARS-Cov-2 Vaccine in Kidney Transplant. *Transplantation* 2021; online ahead of print.
8. Massa F, Cremoni M, Gérard A, et al. Safety and cross-variant immunogenicity of a three-dose COVID-19 mRNA vaccine regimen in kidney transplant recipients. *SSRN preprint*. 2021: 10.2139/ssrn.3890865.
9. Charmetant X, Espi M, Barba T, Ovize A, Morelon E, Thauinat O. Predictive factors of response to 3rd dose of COVID-19 mRNA vaccine in kidney transplant recipients. *medRxiv*. 2021: 2021.08.23.21262293.
10. Peled Y, Ram E, Lavee J, et al. Third dose of the BNT162b2 vaccine in heart transplant recipients: Immunogenicity and clinical experience. *J Heart Lung Transplant* 2021; online ahead of print.
12. Westhoff TH, Seibert FS, Anft M, et al. A third vaccine dose substantially improves humoral and cellular SARS-CoV-2 immunity in renal transplant recipients with primary humoral nonresponse. *Kidney Int* 2021; online ahead of print.
12. Frantzen L, Thibeaut S, Moussi-Frances J, et al. COVID-19 vaccination in haemodialysis patients: good things come in threes. *Nephrol Dial Transplant*. 2021; **20**: 1947-9.
13. Espi M, Charmetant X, Barba T, et al. Justification, safety, and efficacy of a third dose of mRNA vaccine in maintenance hemodialysis patients: a prospective observational study. *medRxiv* 2021: 2021.07.02.21259913.
14. Ducloux D, Colladant M, Chabannes M, Yannaraki M, Courivaud C. Humoral response after 3 doses of the BNT162b2 mRNA COVID-19 vaccine in patients on hemodialysis. *Kidney Int* 2021; **100**(3): 702-4.
15. Longlune N, Nogier MB, Miedouge M, et al. High immunogenicity of a messenger RNA based vaccine against SARS-CoV-2 in chronic dialysis patients. *Nephrol Dial Transplant*. 2021; **31**: 1704-9.
16. Bensouna I, Caudwell V, Kubab S, et al. SARS-CoV-2 antibody response after a third dose of the BNT162b2 vaccine in patients receiving maintenance hemodialysis or peritoneal dialysis. *Am J Kidney Dis*. 2021; online ahead of print.
17. Re D, Seitz-Polski B, Carles M, et al. Humoral and cellular responses after a third dose of BNT162b2 vaccine in patients treated for lymphoid malignancies. *medRxiv* 2021: 2021.07.18.21260669.
18. Gounant V, Ferré VM, Soussi G, et al. Efficacy of SARS-CoV-2 vaccine in thoracic cancer patients: a prospective study supporting a third dose in patients with minimal serologic response after two vaccine doses. *medRxiv* 2021: 2021.08.12.21261806.
19. Benotmane I, Gautier G, Perrin P, et al. Antibody response after a third dose of the mRNA-1273 SARS-CoV-2 vaccine in kidney transplant recipients with minimal serologic response to 2 doses. *JAMA*. 2021; **326**(11): 1063-5.
20. Hall VG, Ferreira VH, Ierullo M, et al. Humoral and cellular immune response and safety of two-dose SARS-CoV-2 mRNA-1273 vaccine in solid organ transplant recipients. *Am J Transplant* 2021; online ahead of print.
21. Greenberger LM, Saltzman LA, Senefeld JW, Johnson PW, DeGennaro LJ, Nichols GL. Anti-spike antibody response to SARS-CoV-2 booster vaccination in patients with B cell-derived hematologic malignancies. *Cancer Cell* 2021; online ahead of print.
22. Connolly CM, Teles M, Frey S, et al. Booster-dose SARS-CoV-2 vaccination in patients with autoimmune disease: a case series. *Ann Rheum Dis* 2021; online ahead of print.

23. Werbel WA, Boyarsky BJ, Ou MT, et al. Safety and immunogenicity of a third dose of SARS-CoV-2 vaccine in solid organ transplant recipients: a case series. *Ann Intern Med.* 2021; **15**: 1330-2.
24. Schrezenmeier E, Rincon-Arevalo H, Stefanski A-L, et al. B and T cell responses after a third dose of SARS-CoV-2 vaccine in kidney transplant recipients. *medRxiv* 2021: 2021.08.12.21261966.
25. Bonelli M, Mrak D, Tobudic S, et al. Additional heterologous versus homologous booster vaccination in immunosuppressed patients without SARS-CoV-2 antibody seroconversion after primary mRNA vaccination: a randomized controlled trial. *medRxiv* 2021: 2021.09.05.21263125.
26. Karaba AH, Zhu X, Liang T, et al. A third dose of SARS-CoV-2 vaccine increases neutralizing antibodies against variants of concern in solid organ transplant recipients. *medRxiv.* 2021: 2021.08.11.21261914.
